# Supplementary material
Source: PubMed Central journal article supplement (PMC5661295)

**Supplementary Table 1. Odds of *dn*DSA Development by Tacrolimus Thresholds after Adjustment for HLA-DR/DQ Eplet Mismatch**

| <b>(n=492, n=44 events)</b>  |                      | <b>Percentage of Tacrolimus Trough Levels Below Threshold*</b> |                   | <b>HLA-DR/DQ Eplet Mismatch (per 10 mismatches)*</b> |  |
|------------------------------|----------------------|----------------------------------------------------------------|-------------------|------------------------------------------------------|--|
| <b>Tacrolimus Thresholds</b> | <b>Odds Ratio</b>    | <b>p value</b>                                                 | <b>Odds Ratio</b> | <b>p value</b>                                       |  |
| <b>&lt; 3.0 ng/ml</b>        | 69.36 (1.07-1494.57) | 0.0470                                                         | 1.31 (1.12-1.54)  | 0.0010                                               |  |
| <b>&lt; 3.5 ng/ml</b>        | 17.77 (1.04-149.14)  | 0.0474                                                         | 1.32 (1.12-1.55)  | 0.0008                                               |  |
| <b>&lt; 4.0 ng/ml</b>        | 9.40 (0.95-55.60)    | 0.0549                                                         | 1.32 (1.13-1.55)  | 0.0006                                               |  |
| <b>&lt; 4.5 ng/ml</b>        | 6.71 (0.94-33.91)    | 0.0566                                                         | 1.33 (1.13-1.56)  | 0.0005                                               |  |
| <b>&lt; 5.0 ng/ml</b>        | 3.00 (0.46-15.43)    | 0.2379                                                         | 1.33 (1.13-1.57)  | 0.0006                                               |  |
| <b>&lt; 5.5 ng/ml</b>        | 1.25 (0.21-6.34)     | 0.7964                                                         | 1.33 (1.23-1.56)  | 0.0008                                               |  |
| <b>&lt; 6.0 ng/ml</b>        | 0.68 (0.13-3.41)     | 0.6505                                                         | 1.32 (1.12-1.56)  | 0.0010                                               |  |

\*isolated to those treated with a tacrolimus regime with  $\geq 5$  tacrolimus levels  $\geq 6$  month post-transplant



Supplementary Table 3. Multivariate Correlates of Graft Survival

| Risk Factors                                                   | Full Cohort (n=596, 57 events) |         |                        |                        | Cohort with tacrolimus regime in first year (n=492, 43 events) |                        |                        |                        | Cohort with histology in first year (n=439, 50 events) |                  |
|----------------------------------------------------------------|--------------------------------|---------|------------------------|------------------------|----------------------------------------------------------------|------------------------|------------------------|------------------------|--------------------------------------------------------|------------------|
|                                                                | Univariate HR<br>(95% CI)      | p value | Model 1<br>(AIC 572.9) | Model 2<br>(AIC 574.5) | Model 5<br>(AIC 435.7)                                         | Model 6<br>(AIC 434.7) | Model 7<br>(AIC 460.6) | Model 3<br>(AIC 473.7) | Model 4<br>(AIC 473.7)                                 | p value          |
| First Transplant                                               | 0.84 (0.25-5.12)               | 0.8101  |                        |                        |                                                                |                        |                        |                        |                                                        |                  |
| Recipient Age at Transplant (years)                            | 0.98 (0.96-0.99)               | 0.0028  |                        |                        |                                                                |                        |                        |                        |                                                        |                  |
| Donor Age (years)                                              | 1.00 (0.98-1.02)               | 0.9667  |                        |                        |                                                                |                        |                        |                        |                                                        |                  |
| Living Donor                                                   | 0.61 (0.35-1.03)               | 0.0637  |                        |                        |                                                                |                        |                        |                        |                                                        |                  |
| Recipient Ethnicity (Caucasian vs. other)                      | 0.65 (0.38-1.15)               | 0.1330  |                        |                        |                                                                |                        |                        |                        |                                                        |                  |
| Cold Ischemic Time (hours)                                     | 1.06 (1.02-1.11)               | 0.0032  |                        | 1.06 (1.01-1.11)       |                                                                |                        |                        | 1.06 (1.01-1.11)       |                                                        | 0.0097           |
| Delayed Graft Function                                         | 2.82 (1.51-4.97)               | 0.0017  | 2.32 (1.24-4.13)       | 0.0099                 | 1.87 (0.95-3.54)                                               | 0.0700                 |                        |                        |                                                        |                  |
| Duration on waitlist (years)                                   | 0.97 (0.86-1.07)               | 0.5484  |                        |                        |                                                                |                        |                        |                        |                                                        |                  |
| Calculated panel reactive antibody                             | 1.00 (0.98-1.01)               | 0.7307  |                        |                        |                                                                |                        |                        |                        |                                                        |                  |
| Non-Adherence vs. Tacrolimus regime                            | 5.67 (3.35-9.55)               | <0.0001 | 3.61 (2.04-6.36)       | <0.0001                | 3.19 (1.77-5.71)                                               | 0.0001                 |                        |                        |                                                        | 4.44 (2.42-8.16) |
| Cyclosporin vs. Tacrolimus regime                              | 1.53 (0.86-2.79)               | 0.1335  |                        |                        |                                                                | 2.62 (1.30-5.22)       | 0.0076                 |                        |                                                        | <0.0001          |
| Calcineurin inhibitor coefficient of variation $\geq 6$ months | 1.01 (0.99-1.03)               | 0.1814  |                        |                        |                                                                |                        |                        |                        |                                                        |                  |
| Tacrolimus coefficient of variation $\geq 6$ months            | 1.04 (1.01-1.05)               | 0.0008  |                        |                        | 1.03 (1.01-1.05)                                               | 0.0134                 |                        |                        |                                                        | 0.0085           |
| HLA-A Mismatch                                                 | 1.04 (0.73-1.49)               | 0.8252  |                        |                        |                                                                |                        |                        |                        |                                                        |                  |
| HLA-B Mismatch                                                 | 1.53 (1.04-2.28)               | 0.0301  |                        |                        |                                                                |                        |                        |                        |                                                        |                  |
| HLA-C Mismatch                                                 | 0.85 (0.46-1.56)               | 0.6092  |                        |                        |                                                                |                        |                        |                        |                                                        |                  |
| HLA-DRB1 Mismatch                                              | 1.59 (1.09-2.38)               | 0.0170  |                        |                        |                                                                |                        |                        |                        |                                                        |                  |
| HLA-DQB1 Mismatch                                              | 1.24 (1.01-1.54)               | 0.0378  |                        |                        |                                                                |                        |                        |                        |                                                        |                  |
| HLA-DQA1 Mismatch                                              | 1.24 (0.85-1.81)               | 0.2650  |                        |                        |                                                                |                        |                        |                        |                                                        |                  |
| HLA-DRB1/3/4/5 Eplet Mismatch (per 10 mismatches)              | 1.18 (0.96-1.44)               | 0.1094  |                        |                        |                                                                |                        |                        |                        |                                                        |                  |
| HLA-DQA1/B1 Eplet Mismatch (per 10 mismatches)                 | 1.35 (1.01-1.81)               | 0.0455  |                        |                        |                                                                |                        |                        |                        |                                                        | 1.45 (1.04-2.02) |
| HLA-DQA1/B1 Eplet Mismatch (per 10 mismatches)                 | 1.29 (1.01-1.67)               | 0.0455  |                        |                        |                                                                |                        |                        |                        |                                                        | 0.0300           |
| gHDSA Development                                              | 4.53 (2.66-7.66)               | <0.0001 | 2.94 (1.66-5.15)       | 0.0003                 | 2.66 (1.50-4.68)                                               | 0.0009                 |                        |                        |                                                        | 2.39 (1.29-4.44) |
| Episodes of TCMR $\geq$ Borderline in 0-12 months              | 1.41 (1.20-1.66)               | <0.0001 |                        |                        |                                                                | 4.86 (2.43-9.62)       | <0.0001                |                        |                                                        | 1.21 (1.00-1.45) |
| Episodes of TCMR $\geq$ 1A in 0-12 months                      | 2.03 (1.46-2.76)               | <0.0001 |                        |                        |                                                                |                        |                        |                        |                                                        | 1.45 (0.99-2.07) |

## Supplemental Figure 1. Eplet Mismatch Cutoffs

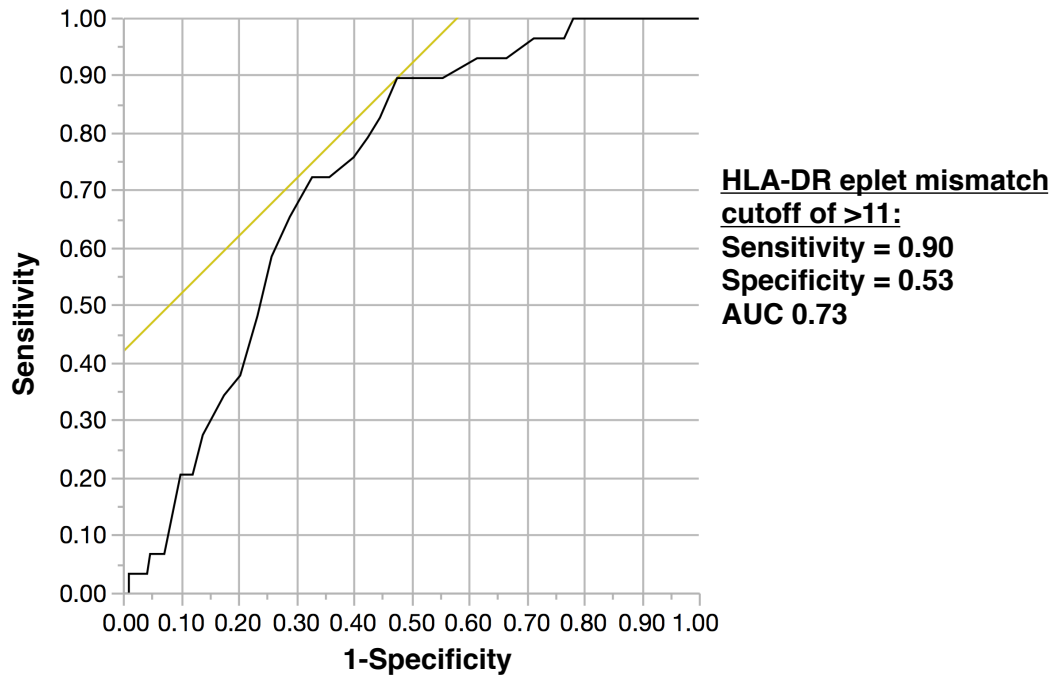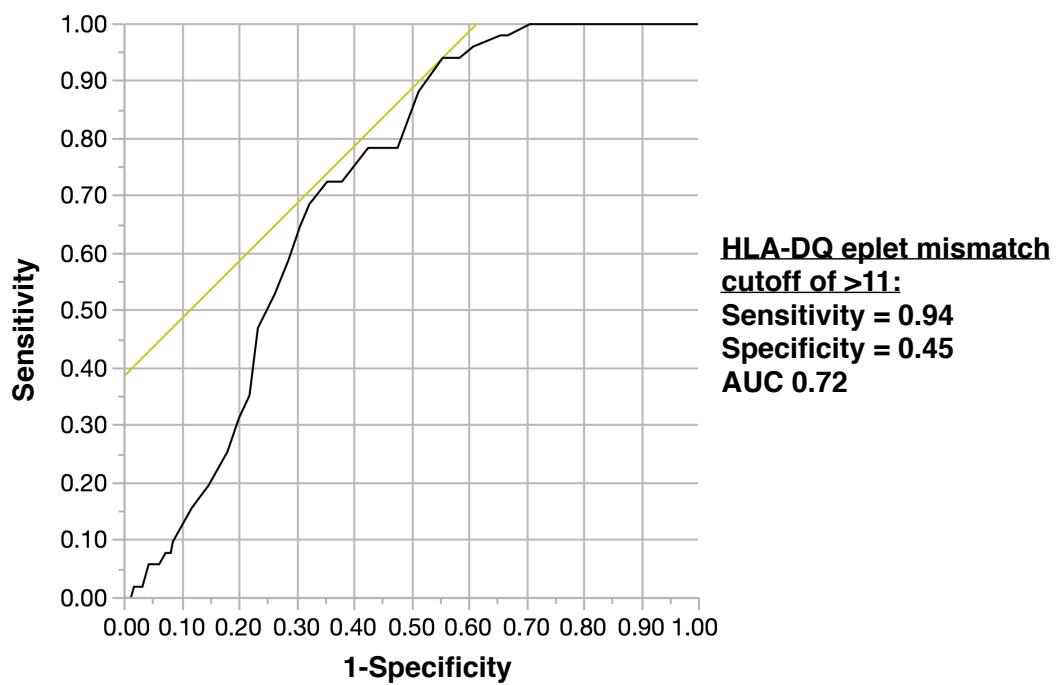

## Supplementary Figure 2. Tacrolimus Trough Levels

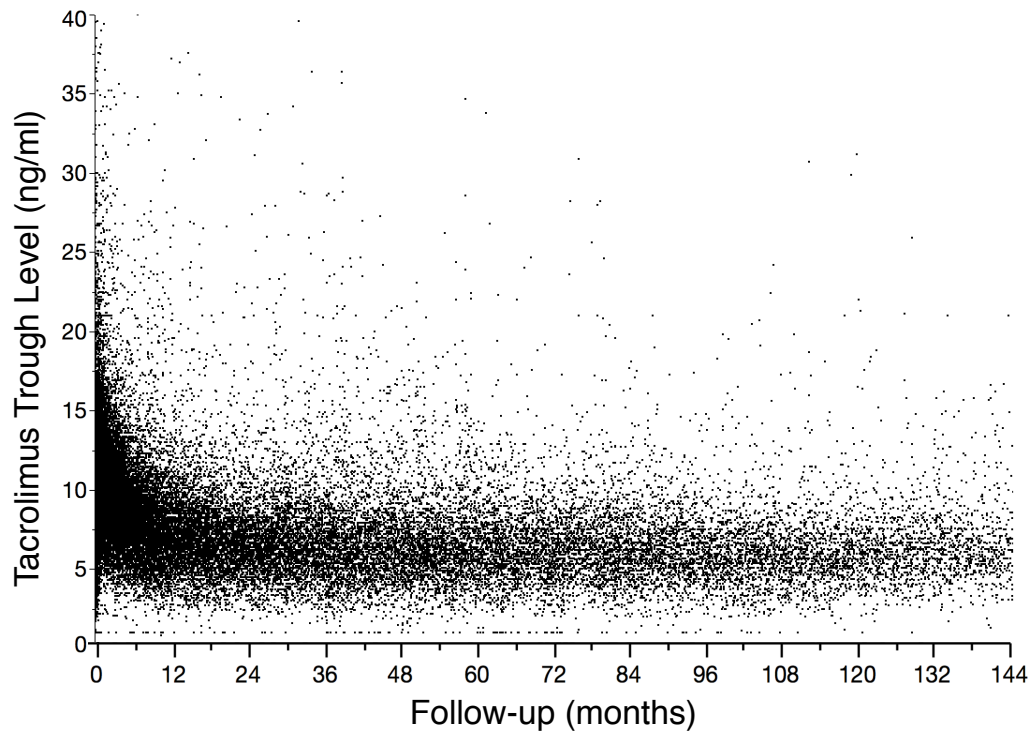

Supplement: ASN.2017030287SupplementaryData.pdf [file ASN.2017030287SupplementaryData.pdf]
